# Supplementary material for: Experimental Pathogenicity of H9N2 Avian Influenza Viruses Harboring a Tri-Basic Hemagglutinin Cleavage Site in Sonali and Broiler Chickens
Source: Viruses. 2023 Feb 7;15(2):461. doi: 10.3390/v15020461 (PMC9967266; doi:10.3390/v15020461)
Supplement: Supplementary file 1 [file viruses-15-00461-s001.zip]

Archive with 4 entries (4 files):
- Supplemental Figure S1.pdf
- Supplemental Figure S2.pdf
- Supplemental Figure S3.pdf
- Supplemental Tables.pdf
