# Supplementary material for: Experimental Pathogenicity of H9N2 Avian Influenza Viruses Harboring a Tri-Basic Hemagglutinin Cleavage Site in Sonali and Broiler Chickens
Source: Viruses. 2023 Feb 7;15(2):461. doi: 10.3390/v15020461 (PMC9967266; doi:10.3390/v15020461)
Supplement: Supplementary file 1 [file viruses-15-00461-s001.zip › Supplemental Figure S1.pdf]

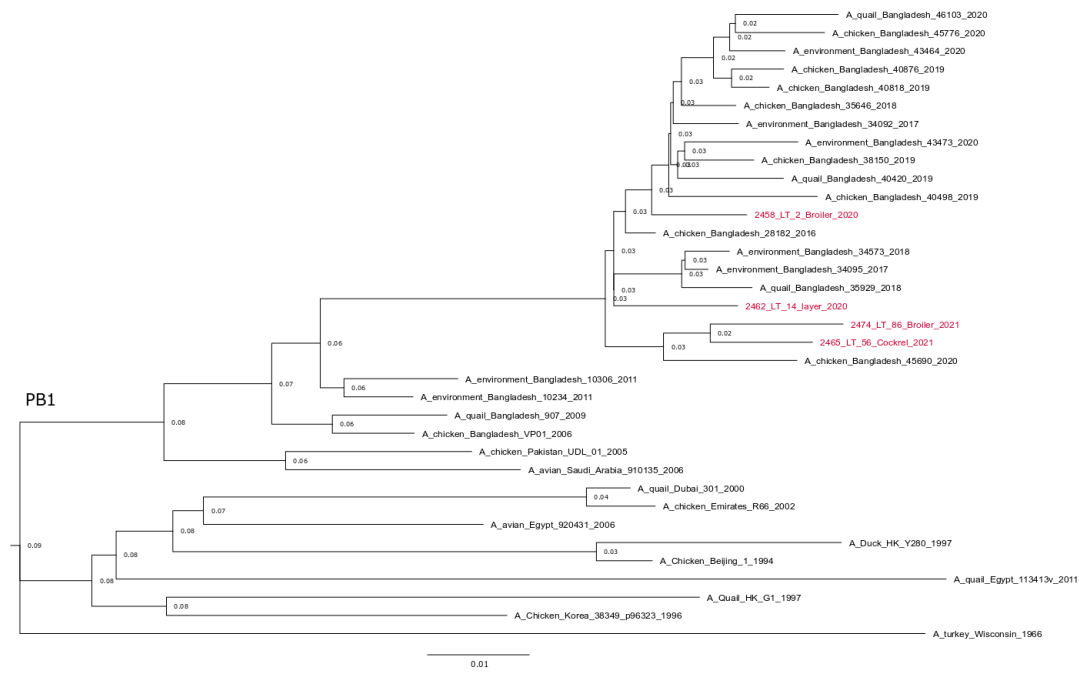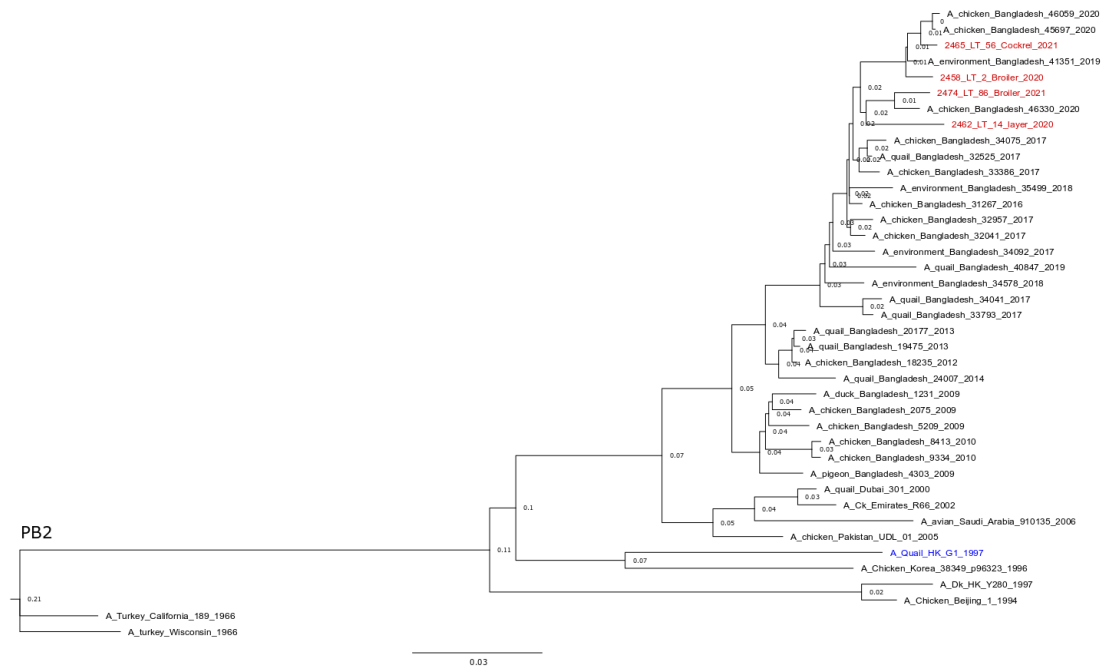

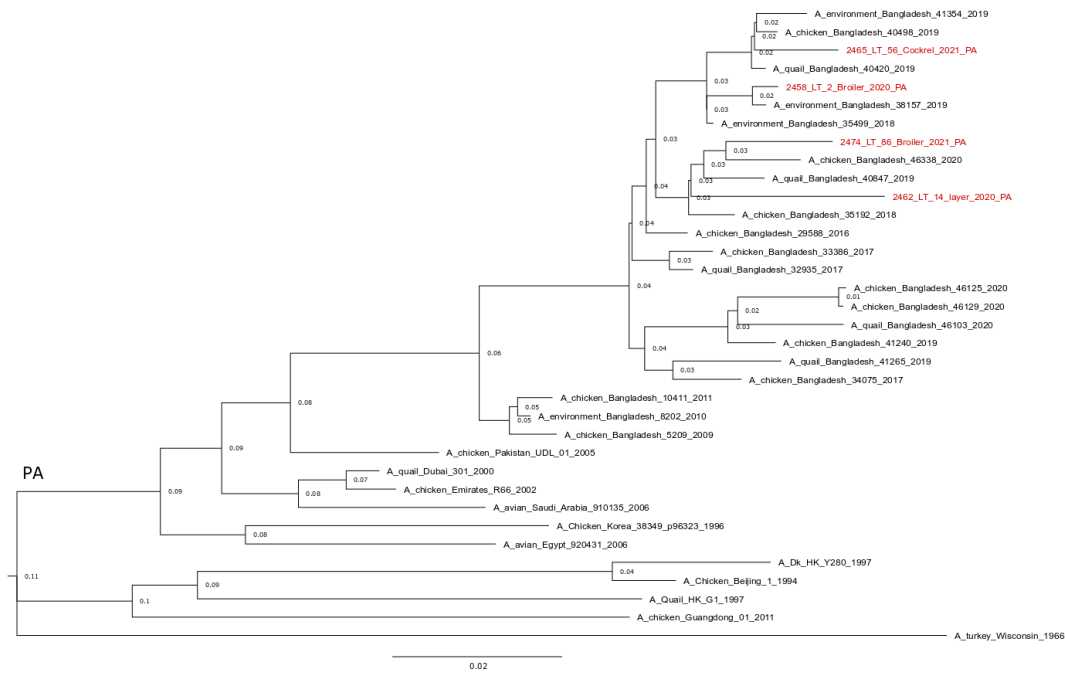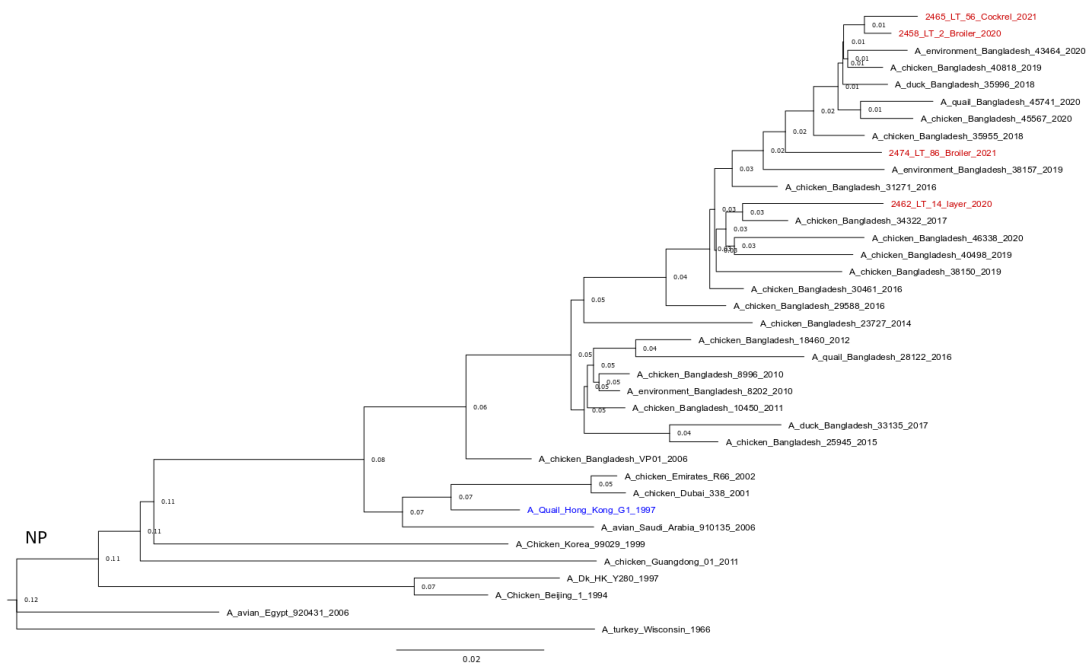

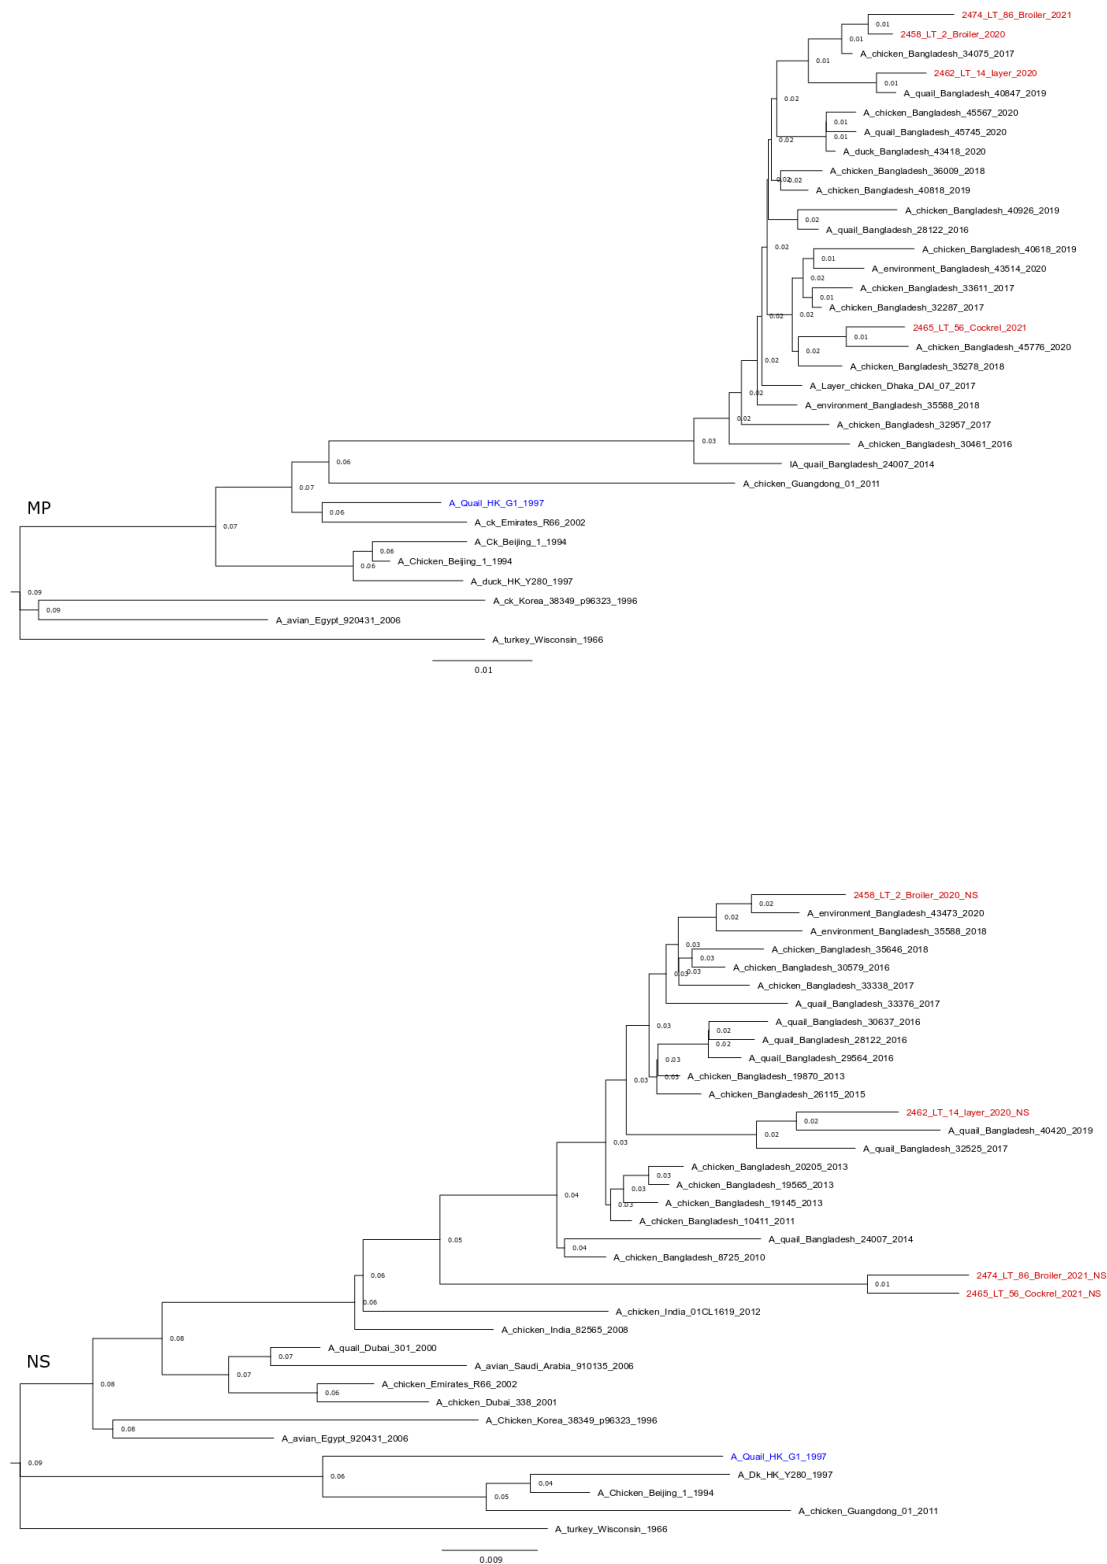

**Supplemental Figure S1:** Phylogenetic tree for PB1, PB2, PA, NP, MP, NS genes of recent H9N2 isolates of Bangladesh. The tree was built using neighbor joining method and Jukes-Cantor substitution model incorporated in the MAFFT package with the confidence intervals estimated by applying 1000 bootstrap algorithm. Red color taxa with circle indicate studied Bangladeshi isolates. Blue color taxa represent G1 reference strain.
