# Supplementary material for: Experimental Pathogenicity of H9N2 Avian Influenza Viruses Harboring a Tri-Basic Hemagglutinin Cleavage Site in Sonali and Broiler Chickens
Source: Viruses. 2023 Feb 7;15(2):461. doi: 10.3390/v15020461 (PMC9967266; doi:10.3390/v15020461)
Supplement: Supplementary file 1 [file viruses-15-00461-s001.zip › Supplemental Tables.pdf]

## Supplemental Tables

Supplemental Table S1. Summary information of AIV H9 isolates from chickens characterized in this study

| Sample ID/<br>Isolate No. | Collection date | Bird type | Age  | Flock size | Vaccination | Clinical signs                                | Mortality | Major findings                                                                      | necropsy |
|---------------------------|-----------------|-----------|------|------------|-------------|-----------------------------------------------|-----------|-------------------------------------------------------------------------------------|----------|
| LT-2                      | 11.03.2020      | Broiler   | 20 d | 1200       | No          | respiratory distress, diarrhea                | 2.5%      | Hemorrhages in muscle congestion in the trachea and lung; ascites; hydropericardium |          |
| LT-14                     | 03.06.2020      | Layer     | 32w  | 3500       | No          | respiratory distress, diarrhea, off feed      | 3.6%      | Congestion in trachea and lung; highly fragile liver, hemorrhages in cecal tonsil   |          |
| LT-56                     | 18.01.2021      | Cockrel   | 45 d | 1500       | No          | respiratory distress, ruffled feather,        | 7.3%      | Congestion in the trachea and lungs; hemorrhages in the pancreas and intestine      |          |
| LT-86                     | 16.06.2021      | Broiler   | 28 d | 800        | No          | respiratory distress, depression and off feed | 5.8%      | Congestion in the trachea, lung, liver, intestine and mesentery; mottled spleen     |          |

**Supplementary Table S2:** GISAID accession numbers of AIV H9 isolates from chickens characterized in this study

| Isolate ID                          | Bird type | Genes | Accession No. |
|-------------------------------------|-----------|-------|---------------|
| A/chicken/Bangladesh/2458-LT2/2020  | Broiler   | PB2   | EPI2187410    |
|                                     |           | PB1   | EPI2187411    |
|                                     |           | PA    | EPI2187412    |
|                                     |           | HA    | EPI2187413    |
|                                     |           | NP    | EPI2187414    |
|                                     |           | NA    | EPI2187415    |
|                                     |           | MP    | EPI2187416    |
|                                     |           | NS    | EPI2187417    |
| A/chicken/Bangladesh/2462-LT14/2020 | Layer     | PB2   | EPI2187418    |
|                                     |           | PB1   | EPI2187419    |
|                                     |           | PA    | EPI2187420    |
|                                     |           | HA    | EPI2187421    |
|                                     |           | NP    | EPI2187422    |
|                                     |           | NA    | EPI2187423    |
|                                     |           | MP    | EPI2187424    |
|                                     |           | NS    | EPI2187425    |
| A/chicken/Bangladesh/2465-LT56/2021 | Cockrel   | PB2   | EPI2187426    |
|                                     |           | PB1   | EPI2187427    |
|                                     |           | PA    | EPI2187428    |
|                                     |           | HA    | EPI2187429    |
|                                     |           | NP    | EPI2187430    |
|                                     |           | NA    | EPI2187431    |
|                                     |           | MP    | EPI2187432    |
|                                     |           | NS    | EPI2187433    |
| A/chicken/Bangladesh/2474-LT86/2021 | Broiler   | PB2   | EPI2187434    |
|                                     |           | PB1   | EPI2187435    |
|                                     |           | PA    | EPI2187436    |
|                                     |           | HA    | EPI2187437    |
|                                     |           | NP    | EPI2187438    |
|                                     |           | NA    | EPI2187439    |
|                                     |           | MP    | EPI2187440    |
|                                     |           | NS    | EPI2187441    |

Supplemental Table S3: Major amino acid changes of HA and NA protein of studied four H9N2 viruses from Bangladesh in comparison to G1 reference strain.

| Name of the isolates                          | Proteins | AF156378.1 _A/Quail/HK/G1/1997* |                     |                                                                                                                                                                                                                                                                                                                                                                  |                                                                                                                                                                                                                                                                                                                                                                                                                                                                                                                                                                                  |
|-----------------------------------------------|----------|---------------------------------|---------------------|------------------------------------------------------------------------------------------------------------------------------------------------------------------------------------------------------------------------------------------------------------------------------------------------------------------------------------------------------------------|----------------------------------------------------------------------------------------------------------------------------------------------------------------------------------------------------------------------------------------------------------------------------------------------------------------------------------------------------------------------------------------------------------------------------------------------------------------------------------------------------------------------------------------------------------------------------------|
|                                               |          | % Amino acid identity           | Number of mutations | List of mutations                                                                                                                                                                                                                                                                                                                                                | Functions related to the mutations                                                                                                                                                                                                                                                                                                                                                                                                                                                                                                                                               |
| A/chicken/Bangladesh/2458-LT2/2020 _15187184  | HA       | 90.239                          | 53                  | S5T, I7M, I9T, V12L, V13I, A15T, N17L, E54D, S63N, T72K, T74N, I75V, V79I, L87S, E90G, S101P, A126S, I147T, R149K, A150S, G153N, S158N, S166N, G167S, F168L, Y176F, S183D, Y196D, E198A, I204T, N206T, N218D, V224L, D233G, Q235I, D239N, V244I, G271E, K282N, T313N, V318I, R319G, V327I, R335K, S337K, M372I, R376K, D377I, I383V, K461R, R498K, R501Q, K510R  | <ul style="list-style-type: none"> <li>- binding small ligand(s)</li> <li>- viral oligomerization interfaces</li> <li>- antibody recognition sites</li> <li>- antigenic drift / escape mutant</li> <li>- involved in a T-cell epitope presented by MHC molecules</li> <li>- host cell receptor binding</li> <li>- virulence and host specificity shift</li> <li>- virulence, antigenic drift / escape mutant</li> <li>- host specificity shift</li> <li>-antigenic drift / escape mutant and virulence.</li> <li>- create or removes a potential N-glycosylation site</li> </ul> |
| A/chicken/Bangladesh/2462-LT14/2020_15187185  |          | 90.239                          |                     | S5T, I7M, I9T, V12L, V13I, A15T, N17I, E54D, S63N, T74N, I75V, V79I, L87S, E90G, S101P, A126S, I147T, R149K, A150S, G153D, S158N, S166N, G167S, F168L, Y176F, S183D, Y196D, E198T, I204T, N206T, N218D, V224L, D233G, Q235I, D239N, V244I, G271E, D280N, K282N, T313N, V318I, R319G, V327I, R335K, S337K, M372I, R376K, D377V, I383V, K461R, R498K, R501Q, K510R |                                                                                                                                                                                                                                                                                                                                                                                                                                                                                                                                                                                  |
| A/chicken/Bangladesh/2465-LT56/2021 _15187186 |          | 89.871                          | 55                  | S5T, I7M, I9T, V12L, V13I, A15T, N17L, E54D, S63N, H66R, T72K, T74N, I75V, V79I, L87S,                                                                                                                                                                                                                                                                           |                                                                                                                                                                                                                                                                                                                                                                                                                                                                                                                                                                                  |

|                                              |    |        |    |                                                                                                                                                                                                                                                                                                                                                                 |                                                                                                                                                                                                                                                                                                                                        |
|----------------------------------------------|----|--------|----|-----------------------------------------------------------------------------------------------------------------------------------------------------------------------------------------------------------------------------------------------------------------------------------------------------------------------------------------------------------------|----------------------------------------------------------------------------------------------------------------------------------------------------------------------------------------------------------------------------------------------------------------------------------------------------------------------------------------|
|                                              |    |        |    | E90G, S101P, A126S, I147T, R149K, A150S, G153D, S158N, S166N, G167S, F168L, Y176F, S183D, Y196D, E198A, I204T, N206T, N218D, V224L, D233G, Q235I, D239N, V244I, G271E, K282N, V287A, I306V, T313N, R319G, V327I, R335K, S337K, M372I, R376K, D377I, I383V, K461R, R498K, R501Q, K510R                                                                           |                                                                                                                                                                                                                                                                                                                                        |
| A/chicken/Bangladesh/2474-LT86/2021_15187187 |    | 90.239 | 53 | S5T, I7M, I9T, V12L, V13I, A15T, N17L, E54D, S63N, T72K, T74N, I75V, V79I, L87S, E90G, S101P, A126S, I147T, R149K, A150S, G153N, S158N, S166N, G167S, F168L, Y176F, S183D, Y196D, E198A, I204T, N206T, N218D, V224L, D233G, Q235I, D239N, V244I, G271E, K282N, T313N, V318I, R319G, V327I, R335K, S337K, M372I, R376K, D377I, I383V, K461R, R498K, R501Q, K510R |                                                                                                                                                                                                                                                                                                                                        |
| A/chicken/Bangladesh/2458-LT2/2020_15187184  | NA | 91.126 | 43 | V13A, I15L, T19I, I20V, M24I, M33V, ins37Q, ins37T, C40S, P43S, N45I, Q47K, P53S, N68G, T70I, K73R, V79P, G123S, G125N, K141R, H153Y, N159S, R197K, M208L, R247K, K251R, L253I, R281L, V305M, S309N, V310I, S313N, N354T, N356D, K365E, S370A, T383L, I390T, D397E, I400N, S404Y, A410V, I414T                                                                  | <ul style="list-style-type: none"> <li>- binding small ligand(s)</li> <li>- viral oligomerization interfaces</li> <li>- antibody recognition sites</li> <li>- creates or removes a new potential N-glycosylation site</li> <li>- strong drug resistance</li> <li>- antigenic drift / escape mutant.</li> <li>- drug binding</li> </ul> |
| A/chicken/Bangladesh/2462-LT14/2020_15187185 |    | 89.610 | 50 | G11S, V13A, I15L, T19I, I20V, M24I, ins37H, ins37T, C40Y, T41I, P43S, N45T, Q47K, P53S, I54T, N68G, T70V, K73R, V79P, A80S, G123S,                                                                                                                                                                                                                              |                                                                                                                                                                                                                                                                                                                                        |

|                                              |  |        |    |                                                                                                                                                                                                                                                                                                                         |  |
|----------------------------------------------|--|--------|----|-------------------------------------------------------------------------------------------------------------------------------------------------------------------------------------------------------------------------------------------------------------------------------------------------------------------------|--|
|                                              |  |        |    | G125N, K141R, H153Y, N159S, V163I, I174M, K185R, R197K, M208L, R247M, K251R, V305M, S309N, V310I, D311Y, S313N, N334D, R336K, N356D, K365Q, S370A, T383V, I390T, D397E, I400N, S404Y, A410V, G412S, I414T                                                                                                               |  |
| A/chicken/Bangladesh/2465-LT56/2021_15187186 |  | 91.126 | 43 | V13A, I15L, T19I, I20V, M24I, M33V, ins37Q, ins37T, C40Y, P43S, N45T, Q47K, P53S, N68G, T70I, K73R, K78T, V79P, G123S, G125N, K141G, H153Y, N159S, R197K, M208L, R247K, K251R, L253I, R281L, V305M, S309N, V310I, S313N, N356D, K365E, S370A, T383L, I390T, D397E, I400N, S404Y, A410V, I414T                           |  |
| A/chicken/Bangladesh/2474-LT86/2021_15187187 |  | 90.260 | 47 | V13A, I15L, T19I, I20V, M24I, ins37Q, ins37T, C40Y, P43S, N45T, Q47K, A48T, P53S, I54T, N68G, T70I, K73R, V79P, N84S, Q91P, G123S, G125N, N139D, K141R, H153Y, N159S, K185R, R197K, M208L, R247I, K251R, L253I, V305M, A306V, S309N, S313N, N356D, S370A, V378I, G379D, T383V, I390T, D397E, I400N, S404Y, A410V, I414T |  |

\*The comparison was based on the mutation analysis at FluSurver of GISAID platform
